# Supplementary material for: GPER mediates the angiocrine actions induced by IGF1 through the HIF-1α/VEGF pathway in the breast tumor microenvironment
Source: PubMed Central journal article supplement (PMC5719673; doi:10.1186/s13058-017-0923-5), 2017-12-06
Supplement: 13058_2017_923_MOESM4_ESM.pdf [file 13058_2017_923_MOESM4_ESM.pdf]

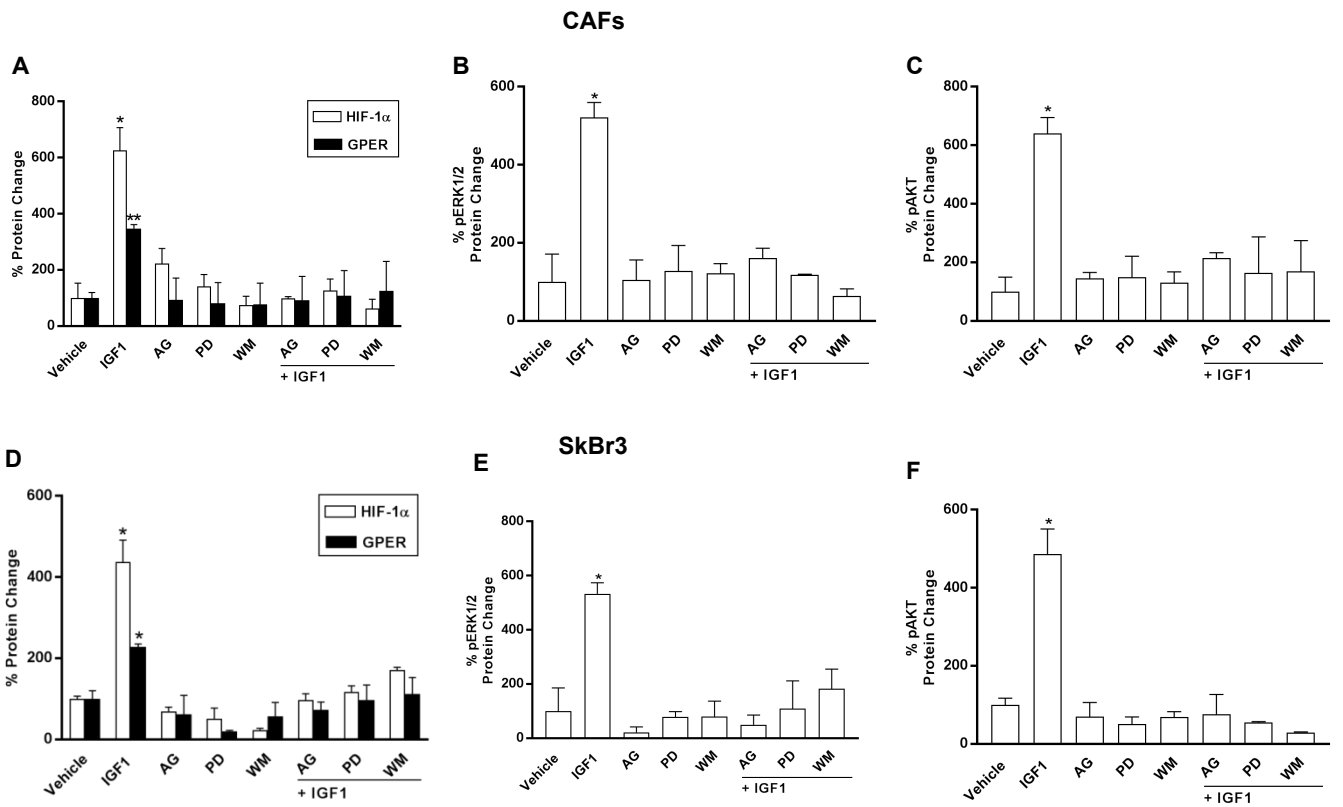

Figure S4
