# Supplementary material for: GPER mediates the angiocrine actions induced by IGF1 through the HIF-1α/VEGF pathway in the breast tumor microenvironment
Source: Springer Nature journal article supplement (doi:10.1186/s13058-017-0923-5), 2017-12-01
Supplement: MOESM1 [file 15284298]

Unsupervised clustering (500 most variable genes)  
of 3 integrated breast cell line datasets.

A

Blue= Luminal, Red=Basal,  
Yellow=Claudin-low, Orange= Basal B, Purple=HER2

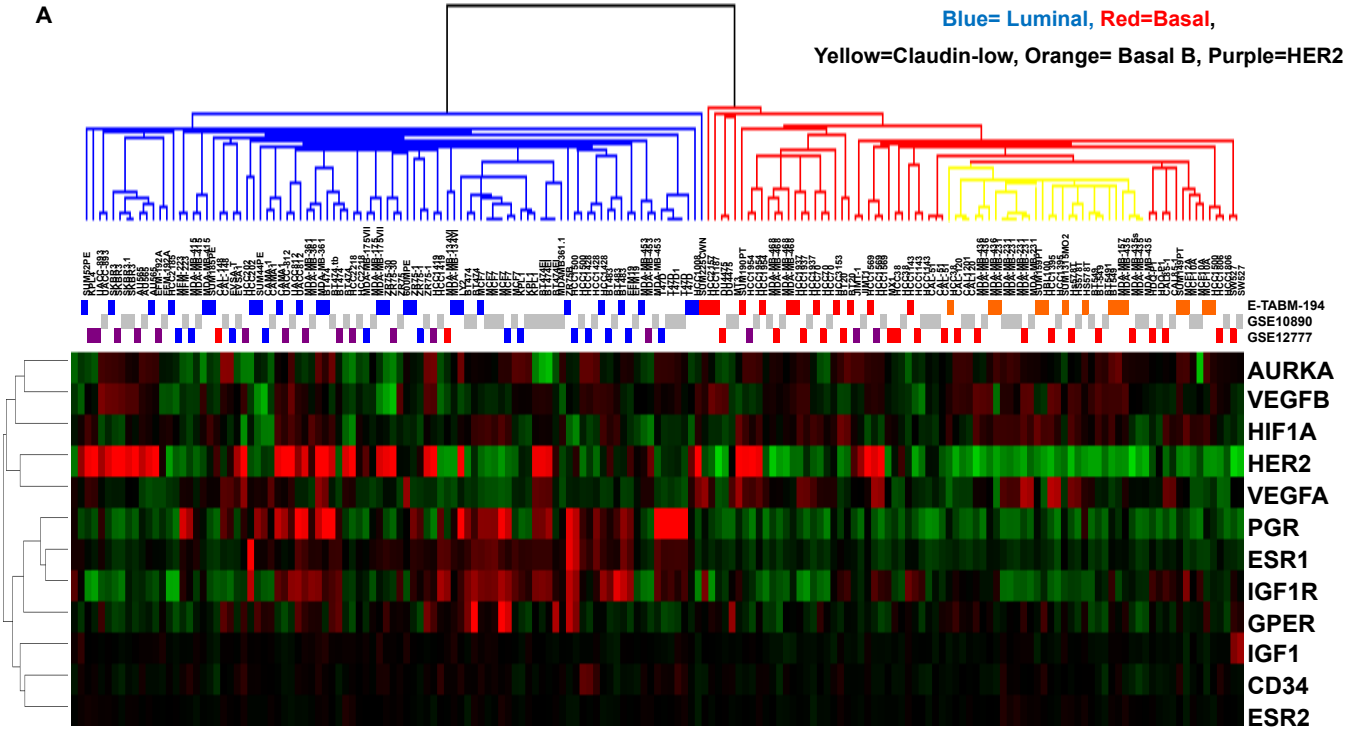

B

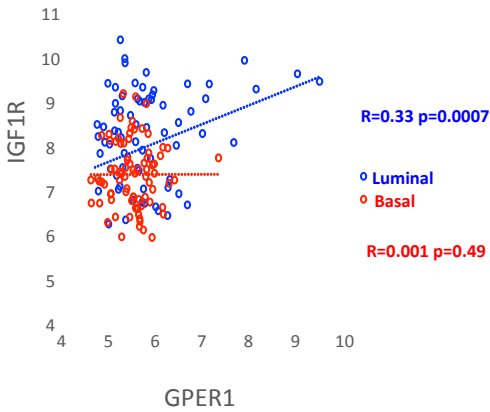

Figure S1
