# Supplementary material for: GPER mediates the angiocrine actions induced by IGF1 through the HIF-1α/VEGF pathway in the breast tumor microenvironment
Source: Springer Nature journal article supplement (doi:10.1186/s13058-017-0923-5), 2017-12-01
Supplement: MOESM5 [file 15284298]

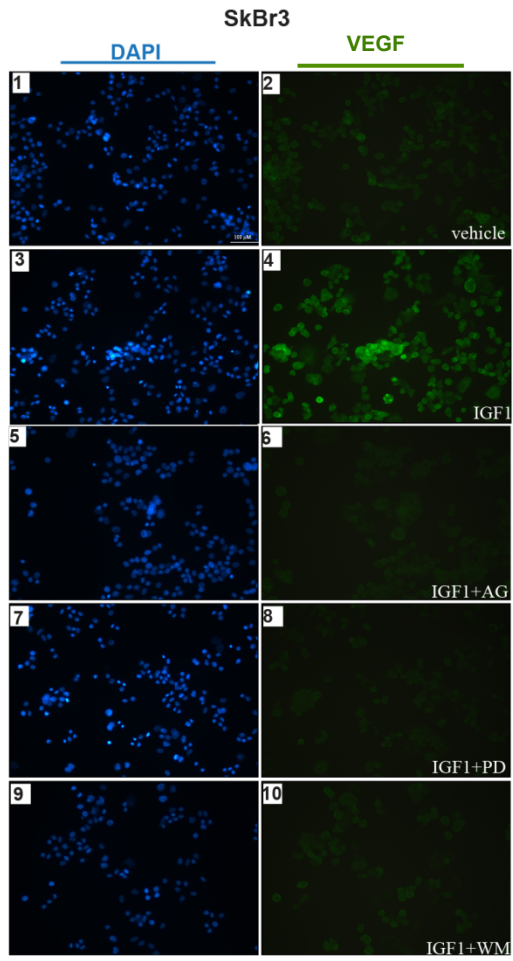

Figure S5
